# Supplementary material for: Embryonic and postnatal telomere length decrease with ovulation order within clutches
Source: PubMed Central journal article supplement (PMC4865837; doi:10.1038/srep25915), 2016-05-13
Supplement: srep25915-s1.pdf [file srep25915-s1.pdf]

1 **Noguera et al. 'EMBRYONIC AND POSTNATAL TELOMERE LENGTH DECREASE WITH OVULATION**  
2 **ORDER WITHIN CLUTCHES'**

3 José C. Noguera , Neil B. Metcalfe, Sophie Reichert, Pat Monaghan

4 **SUPPLEMENTARY INFORMATION**

5 *Origin and previous experience of the adult breeders*

6 The adult breeders used to produce experimental clutches were domesticated zebra finches  
7 that were part of a previous study investigating the effect of the availability of dietary  
8 antioxidants on postnatal telomere dynamics (see <sup>1</sup> for a full description of the dietary  
9 treatments). In that study 36 zebra finch broods were randomly assigned to a 'High' (H) or  
10 'Low' (L) antioxidant dietary treatment until the birds were 40 days old (growth period). At  
11 40 days of age, half of each brood was assigned to follow the same (oral) antioxidant  
12 treatment as during the first 40 days of life, and half to the opposite treatment from day 41  
13 onwards (sexual maturation period). At 90 days, when birds were adult and sexually mature,  
14 the dietary treatment ceased and all birds continued being fed with a standard aviary diet.  
15 All birds were blood sampled at 20, 40 and 90 days of age, and their telomere length  
16 measured by qPCR (a full detailed description of telomere analyses is provided in <sup>1</sup> and the  
17 main text). Only the birds that were reared on the same antioxidant diet (L or H; 23 males  
18 and 23 females) from day 1 to day 90 [hereafter referred as 'Low' (L) or 'High' (H),  
19 respectively] were used during the reproductive trials to produce experimental clutches (see  
20 main text).

21 *Breeding scheme*

22 The first clutch was produced by pairing half of the males in each dietary treatment group (L  
23 or H) with a female of the same dietary treatment as themselves, and the other half with a  
24 female of the opposite treatment; all possible combinations of parental dietary treatments  
25 were equally represented. Both male and female body mass was measured ( $\pm 0.01$  g) on the  
26 day they were paired. All pairs were formed on the same day and were between unfamiliar  
27 and genetically unrelated birds. All breeding cages were equipped with an external nest-box  
28 and coconut fibre as nesting material. Commercial seed mix and water were provided *ad*  
29 *libitum*. Nest-boxes were inspected once daily between 7:00-10:00 h and any new egg was  
30 marked, switched for a dummy clay egg, weighed using an electronic balance ( $\pm 0.01$  g) and  
31 transferred to the external incubator (see main text). All pairs were separated once the first  
32 clutch was completed (if no new eggs were laid for 4 days<sup>2</sup>). Approximately 4 weeks after  
33 this first reproductive event, males were re-paired and allowed to produce a clutch for a  
34 second time, but this time with a new female of the opposite dietary treatment to the one  
35 they had previously. As before, mates were both unrelated and unfamiliar. The age at which  
36 the birds were paired in the two breeding events did not differ between experimental  
37 groups or sexes [First reproductive event (LMM): treatment,  $F_{1,17.32}=0.21$ ,  $p=0.647$ ; sex,  
38  $F_{1,16.51}=0.07$ ,  $p=0.791$ ; treatment x sex,  $F_{1,16.86}=0.56$ ,  $p=0.464$ ; identity of the family of origin  
39 (random factor),  $Z=3.63$ ,  $p<0.001$ ; Second reproductive event (LMM): treatment,  
40  $F_{1,17.36}=0.34$ ,  $p=0.565$ ; sex,  $F_{1,16.56}=0.10$ ,  $p=0.739$ ; treatment x sex,  $F_{1,16.05}=0.23$ ,  $p=0.63$ ;  
41 family of origin,  $Z=3.63$ ,  $p<0.001$ ]. The same was true of body mass on the day of pairing  
42 [First reproductive event (LMM): treatment,  $F_{1,32.17}=0.151$ ,  $p=0.700$ ; sex,  $F_{1,37.43}=1.35$ ,  
43  $p=0.251$ ; treatment x sex,  $F_{1,34.34}=0.438$ ,  $p=0.513$ ; identity of the family of origin,  $Z=0.421$ ,  
44  $p=0.674$ ; Second reproductive event (LMM): treatment,  $F_{1,36.92}=0.635$ ,  $p=0.431$ ; sex,

45  $F_{1,38.28}=2.816$ ,  $p=0.101$ ; treatment x sex,  $F_{1,41.34}=0.01$ ,  $p=0.930$ ; identity of the family of  
46 origin,  $Z=0.954$ ,  $p=0.340$ ].

47

#### 48 *Effect of parental dietary treatment on embryo telomere length*

49 In order to check that the results of the models testing the effect of laying order on egg  
50 mass and embryo telomere length were not influenced by the earlier dietary manipulation  
51 received by the adult breeder, we re-ran the original models (see main text) but including  
52 the maternal and paternal dietary treatment (L or H) as well as their 2-way interaction as  
53 fixed factors. The analyses gave the same results as the original models reported in the main  
54 text, as neither the paternal nor maternal diet or their two-way interaction had significant  
55 effects on egg mass (paternal diet:  $F_{1,14.37}=2.393$ ,  $p=0.144$ ; maternal diet:  $F_{1,16.12}=0.229$ ,  
56  $p=0.639$ ; paternal x maternal diet:  $F_{1,85.40}=2.098$ ,  $p=0.151$ ), or embryo telomere length  
57 (paternal diet:  $F_{1,13.14}=1.218$ ,  $p=0.289$ ; maternal diet:  $F_{1,15.25}=0.001$ ,  $p=0.979$ ; paternal x  
58 maternal diet:  $F_{1,122.83}=0.602$ ,  $p=0.439$ ).

59

#### 60 *Testing the effect of laying order on postnatal telomere dynamics*

61 To investigate the extent to which any effect of laying order on embryo TL persisted into  
62 postnatal development and later life, we examined the existing longitudinal dataset of TL in  
63 red blood cells (RBCs) of the birds used by Noguera et al.<sup>1</sup>; note that the effect of laying  
64 order was not examined in that previous analysis. As described above, the birds were part of  
65 an experiment where the effect of nutritional conditions during development on TL at 20,

66 40 and 90 days of age was investigated. With this database, we ran a repeated measures  
67 mixed model with the birds' identity as a subject term, age as a repeated measure factor  
68 and laying order and clutch size as covariates. Three and two-way interactions among age,  
69 laying order and clutch size were also tested. In the model, we also controlled for all  
70 previous factors that had previously found to have a significant influence on postnatal  
71 telomere length (see <sup>1</sup>), i.e. dietary treatments (during the growth and sexual maturation  
72 period), sex, body mass and the interaction between sex and dietary treatment during  
73 sexual maturation (see <sup>1</sup>). The model was fit with Satterthwaite's approximation for degrees  
74 of freedom and simplified by removal of non-significant terms (in a backward deletion  
75 procedure), starting from three-way interactions.

76 The summary of the repeated measures mixed model is shown in Table S1.  
77 Postnatal telomere length shortened with age (Table S1) but importantly, after controlling  
78 for all factors that had a significant influence on postnatal telomere length, there was still a  
79 strong effect of laying order on telomere length (see Table S1). Thus, postnatal telomere  
80 length decreased with laying order (Table S1), and the effect was persistent across all ages  
81 (laying order x age:  $F_{2,248.32}=0.203$ ,  $p=0.816$ ). Neither clutch size ( $F_{1,321.62}=1.323$ ,  $p=0.251$ ),  
82 body mass ( $F_{1,243.68}=1.773$ ,  $p=0.184$ ) nor any three and two-way interactions among age,  
83 laying order and clutch size were statistically significant (all  $p>0.367$ ).

84

85 Table S1. Summary of the final repeated measures mixed model of postnatal telomere  
 86 length. Note that ‘treatment (sexual maturation)’ refers to the dietary treatment that the  
 87 birds received during the period of sexual maturation (40-90 days).

| Dependent variable     | Source of variation                 | Parameter estimate | F      | $df_{n,d}$ | p-value          |
|------------------------|-------------------------------------|--------------------|--------|------------|------------------|
| Telomere length (RBCs) | Intercept                           | 0.986              |        |            |                  |
|                        | Age (20 days)                       | 0.326              | 41.911 | 2,254.10   | <0.001           |
|                        | (40 days)                           | 0.070              |        |            |                  |
|                        | Laying order                        | -0.044             | 18.726 | 1,326.61   | <b>&lt;0.001</b> |
|                        | Sex (female)                        | 0.165              | 2.568  | 1,324.92   | 0.110            |
|                        | Treatment (sexual maturation) (L)   | 0.037              | 6.791  | 1,325.05   | 0.010            |
|                        | Sex x treatment (sexual maturation) | -0.233             | 14.987 | 1,324.54   | <0.001           |

88 Full model: age + laying order+ clutch size + body mass + sex + treatment (growth period) + treatment (sexual  
 89 maturation) + age x laying order + age x clutch size + sex x treatment (sexual maturation) + age x laying order x  
 90 clutch size.

91

92 **Figure S1. Relationship between the position of a zebra finch egg within a clutch (i.e. its laying**  
 93 **order) and its mass and TL after 72h of incubation (N=151).** (a) Egg mass (mean  $\pm$  SE) increased with  
 94 laying order whereas (b) TL in early-stage embryos (mean  $\pm$  SE) decreased with position of the egg in  
 95 the laying order within the clutch, irrespective of clutch size. Solid lines show linear regressions and  
 96 data points are presented as circles; see text for statistical analysis.

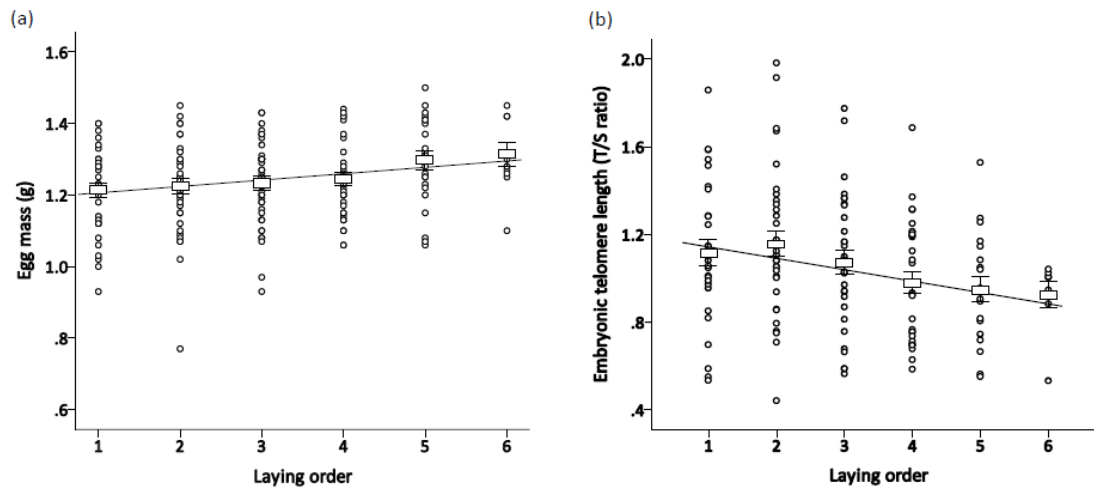

97  
 98 **Figure S2. Early-stage embryo TL in successive clutches (N=151).** On average, embryos from the first  
 99 clutches of female zebra finches had shorter TL than those from the second clutches. Boxes  
 100 represent mean  $\pm$  SE and data points are presented as circles.

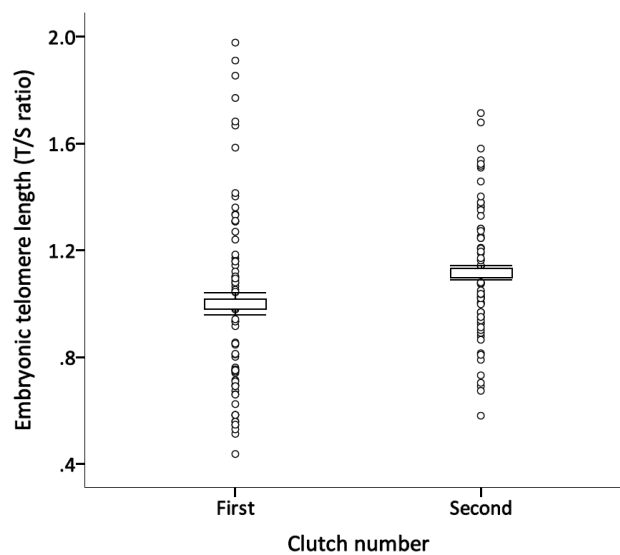

102 **Figure S3. Laying order and postnatal telomere dynamics (N=122).** Relationship between the  
103 original position of a zebra finch within a clutch (i.e. its laying order) and its telomere length (mean  $\pm$   
104 SE) at 20 (white box, dashed line and white circles), 40 (grey box, solid grey line and grey circles) and  
105 90 days of age (black box, solid black line and black circles). Lines show the adjusted regression lines  
106 and data points are presented as circles. There was a significant effect of laying order on telomere  
107 length which was not affected by age (see text for statistical analysis).

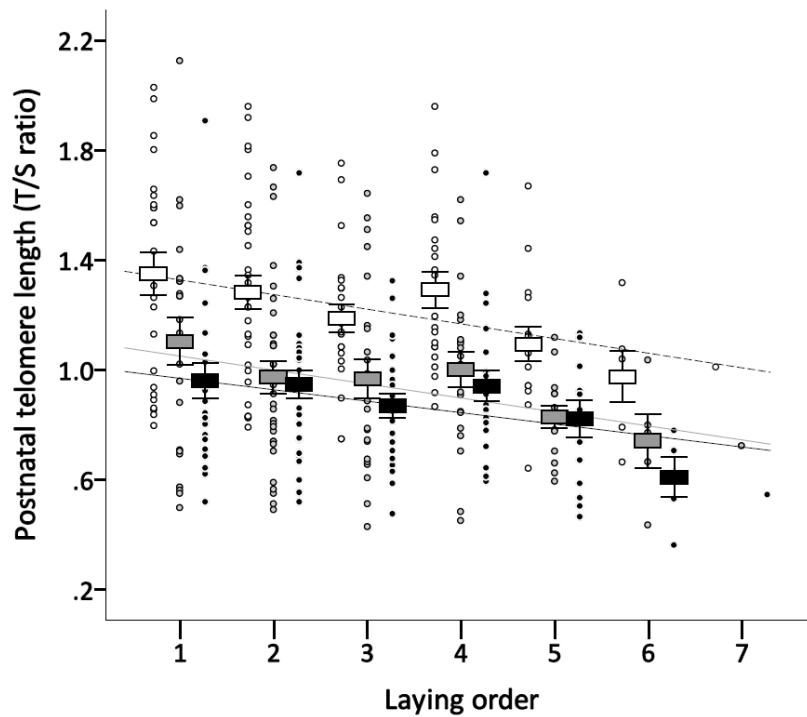

108

109

110 REFERENCES

- 111 1 Noguera, J. C., Metcalfe, N. B., Boner, W. & Monaghan, P. Sex-dependent effects of nutrition  
112 on telomere dynamics in zebra finches (*Taeniopygia guttata*). *Biol. Lett.* **11**, 20140938  
113 (2015).
- 114 2 Blount, J. D., Metcalfe, N. B., Arnold, K. E., Surai, P. F. & Monaghan, P. Effects of neonatal  
115 nutrition on adult reproduction in a passerine bird. *Ibis* **148**, 509-514 (2006).

116

117
